# Supplementary material for: Strengthening COVID-19 pandemic response coordination through public health emergency operations centres (PHEOC) in Africa: Review of a multi-faceted knowledge management and sharing approach, 2020–2021
Source: PubMed Central journal article supplement (PMC10286958; doi:10.1371/journal.pgph.0001386), 2023-06-22
Supplement: pgph.0001386.s001.pdf [file pgph.0001386.s001.pdf]

**S1 Table: Webinar thematic areas, topics by attendees, 2020-2021**

| <i>Thematic and sub-topic</i>            | <i># Registrants</i> | <i># Attendees</i> | <i>%</i>     |
|------------------------------------------|----------------------|--------------------|--------------|
| <b><i>Incident leadership</i></b>        | <b>15,785</b>        | <b>2,940</b>       | <b>23.12</b> |
| <i>Decision-making</i>                   | 1,806                | 268                | 2.11         |
| <i>Effective communication</i>           | 1,825                | 262                | 2.06         |
| <i>Ethics in emergencies</i>             | 697                  | 177                | 1.39         |
| <i>Incident Action Plan (IAP)</i>        | 104                  | 59                 | 0.46         |
| <i>Incident Leadership</i>               | 498                  | 220                | 1.73         |
| <i>Inspiring teams</i>                   | 1,831                | 193                | 1.52         |
| <i>Management by Objectives</i>          | 1,818                | 218                | 1.71         |
| <i>Multi-sectoral coordination</i>       | 196                  | 132                | 1.04         |
| <i>Rapid Response Team mgt.</i>          | 1,057                | 305                | 2.40         |
| <i>Situational awareness</i>             | 1,815                | 258                | 2.03         |
| <i>Staff health and wellbeing</i>        | 1,420                | 302                | 2.38         |
| <i>Task Management</i>                   | 218                  | 91                 | 0.72         |
| <i>Team building and mgt.</i>            | 1,830                | 221                | 1.74         |
| <i>The PHEOC and Info mgt.</i>           | 670                  | 234                | 1.84         |
| <b><i>Incident Management System</i></b> | <b>25,189</b>        | <b>2,841</b>       | <b>22.34</b> |
| <i>Admin Function</i>                    | 2,742                | 287                | 2.26         |
| <i>Country IMS experience</i>            | 3,572                | 323                | 2.54         |
| <i>Implementing IMS</i>                  | 1,673                | 211                | 1.66         |
| <i>IMS: Roundup</i>                      | 4,084                | 466                | 3.66         |
| <i>Introduction to IMS</i>               | 1,624                | 227                | 1.79         |
| <i>Logistics Function</i>                | 2,756                | 266                | 2.09         |
| <i>Operation Function</i>                | 2,408                | 324                | 2.55         |
| <i>Plans Function</i>                    | 2,570                | 268                | 2.11         |
| <i>The Management Function part 1</i>    | 1,690                | 189                | 1.49         |
| <i>The Management Function part 2</i>    | 2,070                | 280                | 2.20         |
| <b><i>Information management</i></b>     | <b>9,055</b>         | <b>1,199</b>       | <b>9.43</b>  |
| <i>Data governance</i>                   | 1,861                | 201                | 1.58         |

| <i>Thematic and sub-topic</i>                                                    | <i># Registrants</i> | <i># Attendees</i> | <i>%</i>     |
|----------------------------------------------------------------------------------|----------------------|--------------------|--------------|
| <i>Emergency mgt. and critical info</i>                                          | 2,033                | 232                | 1.82         |
| <i>Introduction to info mgt.</i>                                                 | 1,847                | 190                | 1.49         |
| <i>PHEOC info products</i>                                                       | 399                  | 118                | 0.93         |
| <i>PHEOC tools part 2</i>                                                        | 796                  | 188                | 1.48         |
| <i>Watch mode operations: EBS</i>                                                | 2,048                | 223                | 1.75         |
| <i>Watch mode operations: EBS tool</i>                                           | 71                   | 47                 | 0.37         |
| <b><i>Information systems for operationalizing the PHEOC</i></b>                 | <b>3,409</b>         | <b>379</b>         | <b>2.98</b>  |
| <i>PHEOC Info systems part 1</i>                                                 | 1,701                | 268                | 2.11         |
| <i>PHEOC Info systems part 2</i>                                                 | 529                  | 74                 | 0.58         |
| <i>PHEOC Info systems part 3</i>                                                 | 585                  | 25                 | 0.20         |
| <i>PHEOC Info systems part 4</i>                                                 | 594                  | 12                 | 0.09         |
| <b><i>Learning lessons from PHEs</i></b>                                         | <b>4,802</b>         | <b>621</b>         | <b>4.88</b>  |
| <i>Capturing lessons: COVID-19 IAR</i>                                           | 1,600                | 217                | 1.71         |
| <i>Reflecting on the past to influence the future: Learning from emergencies</i> | 1,592                | 193                | 1.52         |
| <i>Translating lessons learnt into Actions</i>                                   | 1,610                | 211                | 1.66         |
| <b><i>Logistics and Resource mgt. in emergencies</i></b>                         | <b>15,426</b>        | <b>1,491</b>       | <b>11.73</b> |
| <i>Logistics: Resource mgt.</i>                                                  | 4,125                | 310                | 2.44         |
| <i>Logistics: Round-up session</i>                                               | 4,134                | 332                | 2.61         |
| <i>Logistics: The Logistician</i>                                                | 4,092                | 322                | 2.53         |
| <i>Logs. and supply chain mgt. part 1</i>                                        | 1,531                | 288                | 2.27         |
| <i>Logs. and supply chain mgt. part2</i>                                         | 1,544                | 239                | 1.88         |
| <b><i>Multi-sectoral Coordination</i></b>                                        | <b>7,172</b>         | <b>1,136</b>       | <b>8.93</b>  |
| <i>Developing and using CONOPs in PHEOCs</i>                                     | 1,565                | 217                | 1.71         |
| <i>DRR and Health emergency risk mgt.</i>                                        | 1,080                | 217                | 1.71         |
| <i>Multi-sectoral coordination framework</i>                                     | 1,429                | 243                | 1.91         |
| <i>One-Health and Multidisciplinary approaches to info mgt.</i>                  | 1,547                | 226                | 1.78         |
| <i>Role of law in emergency management</i>                                       | 1,551                | 233                | 1.83         |
| <b><i>PHEOC Handbook and Legal Framework</i></b>                                 | <b>10,268</b>        | <b>1,837</b>       | <b>14.45</b> |
| <i>PHEOC Handbook and Legal Framework part 1</i>                                 | 4,195                | 382                | 3.00         |

| <i>Thematic and sub-topic</i>                    | <i># Registrants</i> | <i># Attendees</i> | <i>%</i>      |
|--------------------------------------------------|----------------------|--------------------|---------------|
| <i>PHEOC Handbook and Legal Framework part 2</i> | 1,312                | 551                | 4.33          |
| <i>PHEOC Handbook and Legal Framework part 3</i> | 1,534                | 292                | 2.30          |
| <i>PHEOC Handbook and Legal Framework part 4</i> | 1,594                | 281                | 2.21          |
| <i>PHEOC Handbook and Legal Framework part 5</i> | 1,633                | 331                | 2.60          |
| <b><i>PHEOC Live tour</i></b>                    | <b>4,124</b>         | <b>271</b>         | <b>2.13</b>   |
| <i>PHEOC Live Tour</i>                           | 4,124                | 271                | 2.13          |
| <b><i>Grand Total</i></b>                        | <b>95,230</b>        | <b>12,715</b>      | <b>100.00</b> |
