# Supplementary material for: Strengthening COVID-19 pandemic response coordination through public health emergency operations centres (PHEOC) in Africa: Review of a multi-faceted knowledge management and sharing approach, 2020–2021
Source: PubMed Central journal article supplement (PMC10286958; doi:10.1371/journal.pgph.0001386), 2023-06-22
Supplement: pgph.0001386.s002.pdf [file pgph.0001386.s002.pdf]

**S2 Table: Frequency of attendance, Webinar series, 2020-2021**

| <b>Frequency of attendance</b> | <b>Number of participants</b> | <b>Return Rate</b> |
|--------------------------------|-------------------------------|--------------------|
| 28 and above times             | 179                           | 1.5                |
| 20 to 27 times                 | 797                           | 6.6                |
| 14 to 19 times                 | 910                           | 7.6                |
| 7 to 13 times                  | 2,877                         | 23.9               |
| 2 to 7 times                   | 5,367                         | 44.6               |
| Once                           | 1,896                         | 15.8               |
